# Supplementary material
Source: PubMed Central journal article supplement (PMC8023428)
Supplement: NIHMS960866-supplement-PMID21165622_Suppl_data1.pdf [file NIHMS960866-supplement-PMID21165622_Suppl_data1.pdf]

**Supplementary Table 1. ABR thresholds for *Myo3a*<sup>K<sup>+/K</sup></sup> mice and their wildtype littermates**

| mouse genotype | months | 5.6 kHz | 8 kHz | 11.3 kHz | 16k Hz | 32 kHz | 40 kHz |
|----------------|--------|---------|-------|----------|--------|--------|--------|
| 88 wt          | 2.5    | 30      | 25    | 15       | 25     | 45     | 60     |
| 125 wt         | 2.5    | 25      | 25    | 10       | 25     | 40     | 45     |
| 139 wt         | 2.5    | 25      | 20    | 10       | 20     | 35     | 25     |
| 143 wt         | 2.5    | 30      | 25    | 10       | 25     | 65     | 75     |
| 156 wt         | 2.5    | 25      | 25    | 5        | 15     | 20     | 20     |
| 159 wt         | 2.5    | 35      | 25    | 5        | 15     | 20     | 30     |
| 167 wt         | 2.5    | 30      | 25    | 10       | 20     | 25     | 15     |
| 86 mutant      | 2.5    | 40      | 25    | 20       | 40     | 30     | 90     |
| 87 mutant      | 2.5    | 40      | 30    | 15       | 25     | 15     | 50     |
| 89 mutant      | 2.5    | 35      | 20    | 20       | 30     | 40     | 85     |
| 99 mutant      | 2.5    | 35      | 30    | 20       | 25     | 35     | 85     |
| 102 mutant     | 2.5    | 40      | 30    | 20       | 25     | 30     | 40     |
| 103 mutant     | 2.5    | 45      | 40    | 25       | 25     | 40     | 50     |
| 127 mutant     | 2.5    | 35      | 20    | 10       | 25     | 65     | 75     |
| 133 mutant     | 2.5    | 30      | 20    | 5        | 30     | 55     | 75     |
| 144 mutant     | 2.5    | 30      | 30    | 10       | 30     | 40     | 80     |
| 145 mutant     | 2.5    | 30      | 25    | 20       | 25     | 40     | 65     |
| 146 mutant     | 2.5    | 25      | 20    | 15       | 30     | 25     | 50     |
| 148 mutant     | 2.5    | 30      | 35    | 15       | 30     | 40     | 80     |
| 158 mutant     | 2.5    | 35      | 30    | 10       | 25     | 45     | 60     |
| 163 mutant     | 2.5    | 35      | 25    | 10       | 25     | 25     | 40     |
| avg wt         | 2.5    | 29      | 24    | 9        | 21     | 36     | 39     |
| avg mutant     | 2.5    | 35      | 27    | 15       | 28     | 38     | 66     |
| P(wt v mutant) | 2.5    | 0.015   | 0.247 | 0.019    | 0.002  | 0.784  | 0.006  |
| 88 wt          | 5.0    | 35      | 25    | 10       | 20     | 65     | 70     |
| 125 wt         | 5.0    | 35      | 25    | 15       | 20     | 55     | 85     |
| 139 wt         | 5.0    | 30      | 20    | 5        | 20     | 70     | 75     |
| 143 wt         | 5.0    | 30      | 25    | 15       | 20     | 75     | 75     |
| 156 wt         | 5.0    | 35      | 30    | 15       | 15     | 45     | 70     |
| 159 wt         | 5.0    | 35      | 30    | 20       | 15     | 25     | 25     |
| 167 wt         | 5.0    | 30      | 25    | 20       | 20     | 20     | 15     |
| 125b wt        | 5.0    | 30      | 25    | 20       | 20     | 65     | 80     |
| 86 mutant      | 5.0    | 35      | 30    | 40       | 40     | 80     | 85     |
| 87 mutant      | 5.0    | 35      | 40    | 25       | 45     | 55     | 90     |
| 89 mutant      | 5.0    | 35      | 25    | 35       | 50     | 80     | 75     |
| 99 mutant      | 5.0    | 45      | 35    | 50       | 40     | 75     | 80     |
| 102 mutant     | 5.0    | 35      | 30    | 30       | 30     | 70     | 85     |
| 103 mutant     | 5.0    | 45      | 40    | 20       | 15     | 45     | 45     |
| 127 mutant     | 5.0    | 40      | 25    | 10       | 25     | 70     | 85     |
| 133 mutant     | 5.0    | 40      | 35    | 25       | 35     | 75     | 90     |
| 144 mutant     | 5.0    | 40      | 40    | 55       | 35     | 70     | 75     |
| 145 mutant     | 5.0    | 35      | 35    | 40       | 30     | 55     | 70     |
| 146 mutant     | 5.0    | 30      | 25    | 30       | 35     | 65     | 75     |
| 148 mutant     | 5.0    | 40      | 35    | 45       | 35     | 65     | 85     |
| 158 mutant     | 5.0    | 45      | 40    | 35       | 30     | 90     | 90     |
| 163 mutant     | 5.0    | 25      | 25    | 35       | 25     | 45     | 65     |
| 102b mutant    | 5.0    | 30      | 30    | 30       | 35     | 65     | 80     |
| 103b mutant    | 5.0    | 45      | 35    | 15       | 15     | 35     | 35     |
| 127b mutant    | 5.0    | 40      | 20    | 20       | 20     | 80     | 85     |
| 133b mutant    | 5.0    | 35      | 30    | 25       | 25     | 80     | 80     |
| avg wt         | 5.0    | 33      | 26    | 15       | 19     | 53     | 62     |
| avg mutant     | 5.0    | 38      | 32    | 31       | 31     | 67     | 76     |
| P(wt v mutant) | 5.0    | 0.000   | 0.000 | 0.007    | 0.201  | 0.556  | 0.180  |
| 88 wt          | 7.5    | 45      | 35    | 20       | 30     | 80     | 85     |
| 125 wt         | 7.5    | 30      | 25    | 15       | 20     | 60     | 80     |
| 139 wt         | 7.5    | 30      | 20    | 15       | 25     | 60     | 65     |
| 143 wt         | 7.5    | 30      | 30    | 20       | 25     | 60     | 60     |
| 156 wt         | 7.5    | 30      | 20    | 15       | 20     | 65     | 75     |
| 159 wt         | 7.5    | 40      | 35    | 20       | 20     | 35     | 40     |
| 167 wt         | 7.5    | 25      | 25    | 10       | 20     | 20     | 25     |
| 86 mutant      | 7.5    | 40      | 35    | 35       | 45     | 70     | 90     |
| 87 mutant      | 7.5    | 40      | 35    | 40       | 50     | 70     | 90     |
| 89 mutant      | 7.5    | 40      | 35    | 45       | 40     | 80     | 80     |

| mouse genotype | months | 5.6 kHz | 8 kHz | 11.3 kHz | 16k Hz | 32 kHz | 40 kHz |
|----------------|--------|---------|-------|----------|--------|--------|--------|
| 99 mutant      | 7.5    | 45      | 30    | 50       | 45     | 80     | 80     |
| 102 mutant     | 7.5    | 35      | 35    | 50       | 35     | 85     | 85     |
| 103 mutant     | 7.5    | 40      | 40    | 30       | 20     | 40     | 50     |
| 127 mutant     | 7.5    | 35      | 30    | 15       | 25     | 70     | 83     |
| 133 mutant     | 7.5    | 45      | 40    | 35       | 50     | 80     | 85     |
| 144 mutant     | 7.5    | 45      | 45    | 55       | 55     | 78     | 78     |
| 145 mutant     | 7.5    | 45      | 55    | 50       | 45     | 75     | 78     |
| 146 mutant     | 7.5    | 35      | 35    | 40       | 40     | 70     | 75     |
| 148 mutant     | 7.5    | 50      | 55    | 55       | 50     | 78     | 78     |
| 158 mutant     | 7.5    | 35      | 30    | 30       | 30     | 75     | 82     |
| 163 mutant     | 7.5    | 50      | 35    | 55       | 35     | 75     | 80     |
| avg wt         | 7.5    | 33      | 27    | 16       | 23     | 54     | 61     |
| avg mutant     | 7.5    | 41      | 38    | 42       | 40     | 73     | 80     |
| P(wt v mutant) | 7.5    | 0.005   | 0.006 | 0.000    | 0.000  | 0.010  | 0.015  |
| 88 wt          | 10.0   | 45      | 30    | 15       | 30     | 75     | 85     |
| 125 wt         | 10.0   | 30      | 25    | 15       | 30     | 70     | 75     |
| 139 wt         | 10.0   | 35      | 25    | 20       | 55     | 70     | 85     |
| 143 wt         | 10.0   | 40      | 30    | 20       | 45     | 70     | 85     |
| 156 wt         | 10.0   | 35      | 35    | 15       | 75     | 80     | 85     |
| 159 wt         | 10.0   | 45      | 30    | 10       | 35     | 70     | 75     |
| 167 wt         | 10.0   | 40      | 20    | 10       | 15     | 35     | 80     |
| 86 mutant      | 10.0   | 55      | 45    | 45       | 55     | 85     | 85     |
| 87 mutant      | 10.0   | 40      | 40    | 40       | 45     | 85     | 85     |
| 89 mutant      | 10.0   | 35      | 45    | 50       | 50     | 85     | 85     |
| 99 mutant      | 10.0   | 35      | 35    | 40       | 50     | 75     | 80     |
| 102 mutant     | 10.0   | 45      | 40    | 55       | 60     | 85     | 85     |
| 103 mutant     | 10.0   | 55      | 55    | 65       | 35     | 70     | 85     |
| 127 mutant     | 10.0   | 40      | 30    | 25       | 65     | 80     | 85     |
| 133 mutant     | 10.0   | 50      | 40    | 40       | 80     | 85     | 85     |
| 144 mutant     | 10.0   | 80      | 85    | 85       | 85     | 85     | 85     |
| 145 mutant     | 10.0   | 50      | 45    | 45       | 35     | 70     | 85     |
| 146 mutant     | 10.0   | 40      | 35    | 25       | 35     | 75     | 85     |
| 148 mutant     | 10.0   | 50      | 45    | 50       | 55     | 80     | 85     |
| 158 mutant     | 10.0   | 50      | 30    | 30       | 60     | 85     | 85     |
| 163 mutant     | 10.0   | 40      | 35    | 30       | 50     | 70     | 85     |
| avg wt         | 10.0   | 39      | 28    | 15       | 41     | 67     | 81     |
| avg mutant     | 10.0   | 48      | 43    | 45       | 54     | 80     | 85     |
| P(wt v mutant) | 10.0   | 0.070   | 0.011 | 0.000    | 0.097  | 0.012  | 0.027  |
| 88 wt          | 13.0   | 40      | 30    | 15       | 35     | 80     | 85     |
| 125 wt         | 13.0   | 55      | 45    | 30       | 50     | 85     | 85     |
| 139 wt         | 13.0   | 45      | 40    | 35       | 75     | 85     | 85     |
| 143 wt         | 13.0   | 60      | 50    | 50       | 80     | 85     | 85     |
| 156 wt         | 13.0   | 55      | 40    | 55       | 75     | 85     | 85     |
| 159 wt         | 13.0   | 55      | 25    | 25       | 25     | 75     | 85     |
| 86 mutant      | 13.0   | 55      | 40    | 40       | 65     | 85     | 85     |
| 87 mutant      | 13.0   | 40      | 50    | 45       | 50     | 80     | 85     |
| 89 mutant      | 13.0   | 45      | 35    | 35       | 70     | 80     | 80     |
| 99 mutant      | 13.0   | 45      | 50    | 45       | 50     | 85     | 85     |
| 102 mutant     | 13.0   | 35      | 30    | 50       | 55     | 85     | 85     |
| 103 mutant     | 13.0   | 35      | 35    | 35       | 35     | 75     | 85     |
| 127 mutant     | 13.0   | 70      | 65    | 70       | 75     | 85     | 80     |
| 133 mutant     | 13.0   | 80      | 75    | 60       | 75     | 85     | 80     |
| 144 mutant     | 13.0   | 55      | 50    | 55       | 60     | 85     |        |
| 145 mutant     | 13.0   | 70      | 60    | 70       | 50     | 85     | 85     |
| 146 mutant     | 13.0   | 55      | 70    | 60       | 65     | 85     | 85     |
| 148 mutant     | 13.0   | 45      | 50    | 55       | 50     | 85     |        |
| 158 mutant     | 13.0   | 65      | 50    | 45       | 60     | 85     | 85     |
| 163 mutant     | 13.0   | 55      | 45    | 50       | 60     | 80     | 85     |
| avg wt         | 13.0   | 52      | 38    | 35       | 57     | 83     | 85     |
| avg mutant     | 13.0   | 54      | 50    | 51       | 59     | 83     | 84     |
| P(wt v mutant) | 13.0   | 0.756   | 0.062 | 0.017    | 0.805  | 0.679  | 0.201  |
